# Supplementary material for: In Vitro Models for the Development of Peripheral Nerve Conduits, Part I: Design of a Fibrin Gel-Based Non-Contact Test
Source: MDPI journal article supplement (doi:10.3390/polym13203573), 2021-10-16
Supplement: s1 [file s1]

## SUPPLEMENTARY MATERIAL

# In Vitro Models for the Development of Peripheral Nerve Conduits, Part I: Design of a Fibrin Gel-Based Non-Contact Test

Paola De Stefano <sup>1\*</sup>, Angelica Silvia Federici <sup>1,2</sup> and Lorenza Draghi <sup>1,2</sup>

<sup>1</sup> Department of Chemistry, Materials and Chemical Engineering “G. Natta”, Politecnico di Milano, via Mancinelli 7, 20131 Milan, Italy;

<sup>2</sup> INSTM – National Interuniversity Consortium of Materials Science and Technology, Local Unit Politecnico di Milano, P.zza Leonardo da Vinci 32, 20133 Milan, Italy;

\* Correspondence: paola.destefano@polimi.it;

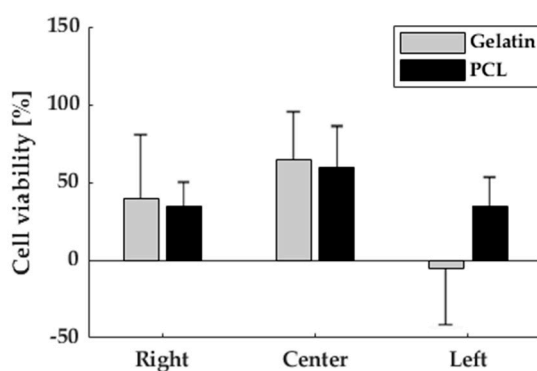

**Figure S1.** Cell viability evaluation along tubular NGCs scaffolds both for gelatin and PCL samples.

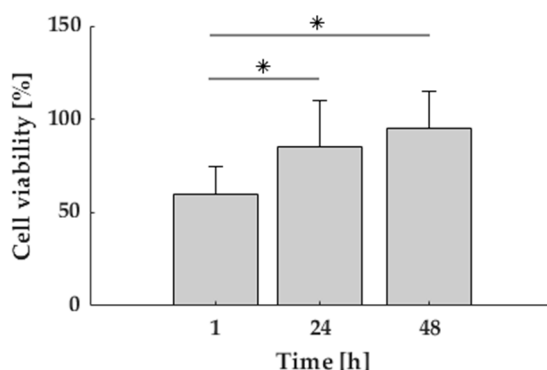

**Figure S2.** Sample pre-conditioning evaluation: cell viability after 1 h, 24 h and 48 h.

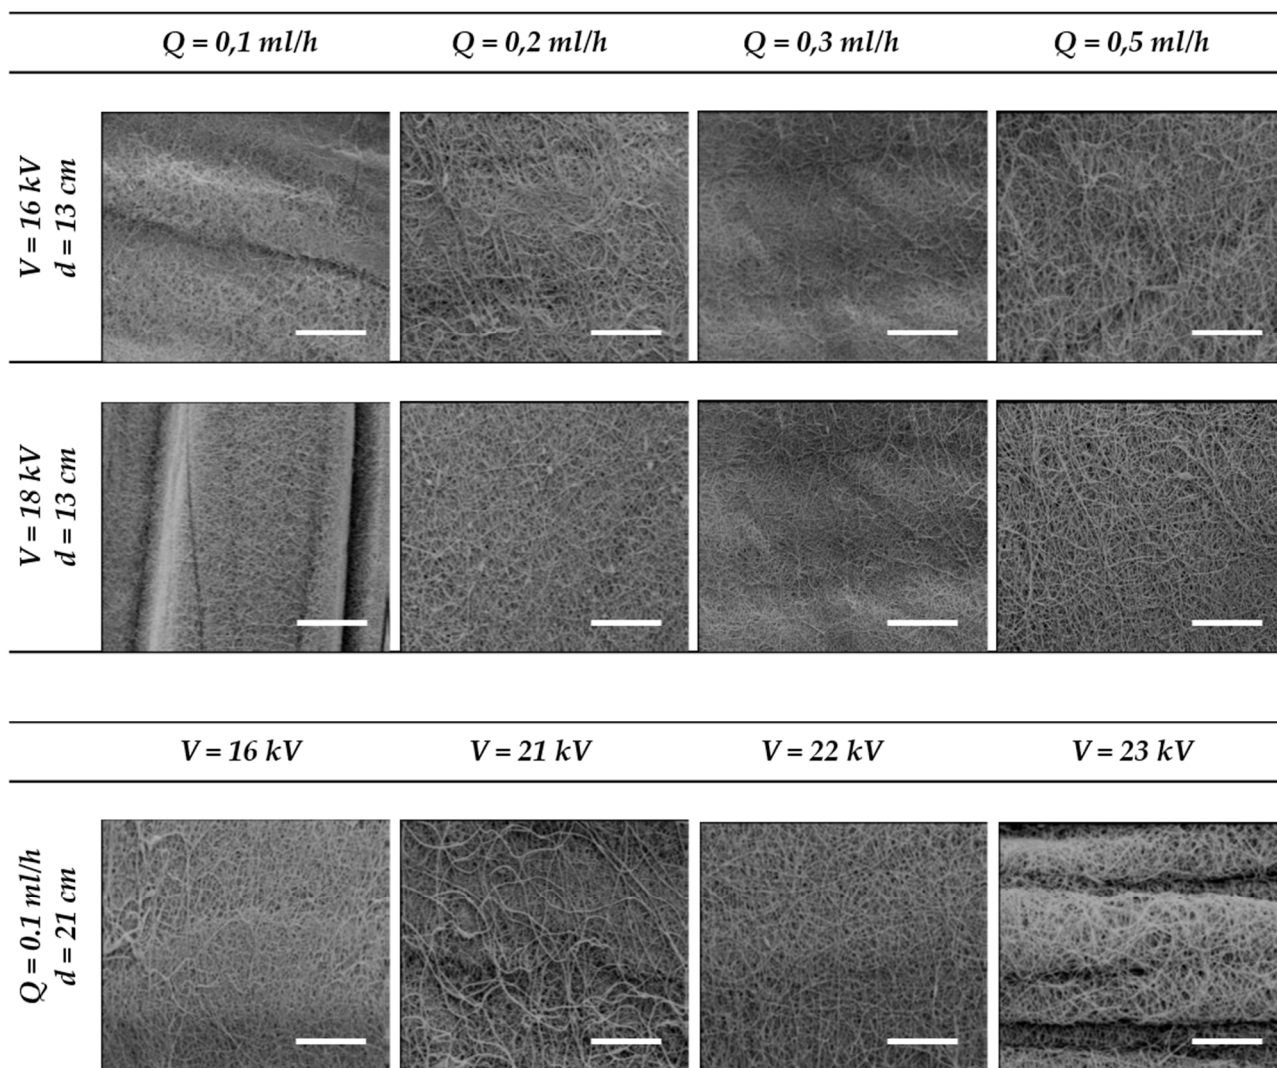

**Figure S3.** SEM images for gelatin NGCs. Scale bar: 20  $\mu\text{m}$ .

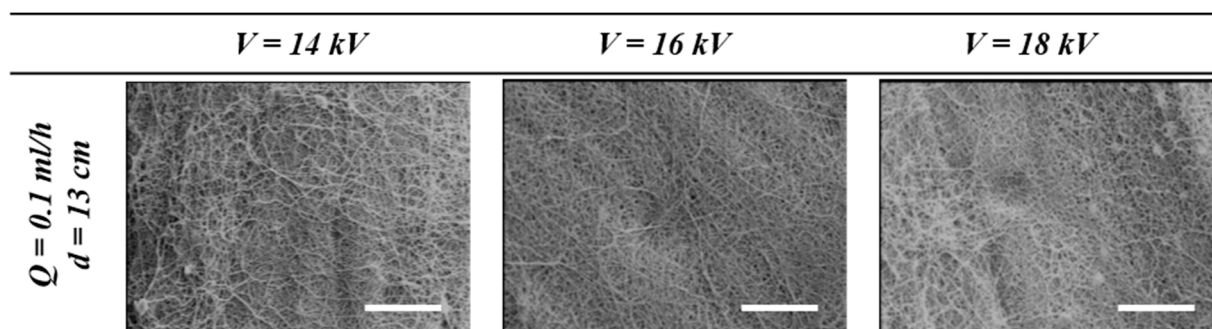

**Figure S4.** SEM images for PCL NGCs. Scale bar: 20  $\mu\text{m}$ .
